# Supplementary material for: Two magnetic phase transitions, driven by symmetry breaking and isostructural phase transitions, in a nickel-bis-dithiolene spin system
Source: Royal Society of Chemistry journal article supplement (doi:10.1039/c3nj01101a), 2013-10-11
Supplement: c3nj01101a.pdf [file c3nj01101a.pdf]

# **Two magnetic phase transition driven respectively by symmetry breaking and isostructural phase transitions in a nickel-bis-dithiolene spin system**

Wei-Hua Ning,<sup>a,b</sup> Xuan-Rong Chen,<sup>a,b</sup> Jian-Lan Liu,\*<sup>a,b</sup> Ping-Chun Guo<sup>a,b</sup> and Xiao-Ming Ren\*<sup>a,b,c</sup>

<sup>a</sup> State Key Laboratory of Materials-Oriented Chemical Engineering and College of Science, Nanjing University of Technology, Nanjing 210009

<sup>b</sup> College of Materials Science and Engineering, Nanjing University of Technology, Nanjing 210009

<sup>c</sup> Coordination Chemistry Institute & State Key Laboratory, Nanjing University, Nanjing 210093

Tel.: +86 25 58139476

Fax: +86 25 58139481

Email: [xmren@njut.edu.cn](mailto:xmren@njut.edu.cn)

**Table S1:** Characteristic bond lengths (Å) and angles (°) in  $[\text{Ni}(\text{mnt})_2]^-$  moiety

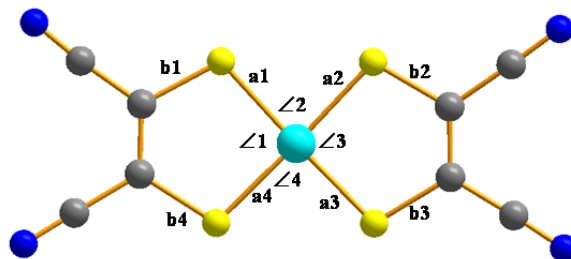

|            | 200 K ( $\alpha$ phase) |            | 296 K ( $\beta$ phase) | 353 K ( $\gamma$ phase) |
|------------|-------------------------|------------|------------------------|-------------------------|
|            | With Ni1                | With Ni2   |                        |                         |
| $\angle 1$ | 92.57(4)                | 92.57(4)   | 92.23(6)               | 92.32(7)                |
| $\angle 2$ | 92.90(4)                | 92.61(4)   | 92.39(6)               | 92.43(7)                |
| $\angle 3$ | 87.64(4)                | 87.92(4)   | 87.61(6)               | 87.44(6)                |
| $\angle 4$ | 86.82(4)                | 87.34(4)   | 87.80(6)               | 87.82(6)                |
| <i>a1</i>  | 2.1451(10)              | 2.1500(11) | 2.1311(15)             | 2.1373(16)              |
| <i>a2</i>  | 2.1457(11)              | 2.1500(11) | 2.1409(16)             | 2.1405(17)              |
| <i>a3</i>  | 2.1500(10)              | 2.1518(11) | 2.1413(16)             | 2.1412(17)              |
| <i>a4</i>  | 2.1554(10)              | 2.1539(11) | 2.1428(16)             | 2.1474(17)              |
| <i>b1</i>  | 1.719(4)                | 1.715(4)   | 1.715(5)               | 1.698(6)                |
| <i>b2</i>  | 1.710(4)                | 1.718(4)   | 1.719(6)               | 1.716(6)                |
| <i>b3</i>  | 1.712(4)                | 1.724(4)   | 1.714(5)               | 1.696(6)                |
| <i>b4</i>  | 1.719(4)                | 1.714(4)   | 1.723(6)               | 1.709(6)                |

**Table S2:** The equivalent displacement parameters ( $U_{eq}$ ) and the ratios for the same atoms at different temperatures as compared with 296 K

| Non-hydrogen atom | $U_{eq}$ (353 K) in $\gamma$ phase | $U_{eq}$ (296 K) in $\beta$ phase | $U_{eq}$ (353 K)/ $U_{eq}$ (296K) |
|-------------------|------------------------------------|-----------------------------------|-----------------------------------|
| Ni1               | 0.0828(4)                          | 0.0728(3)                         | 1.137                             |
| S1                | 0.0953(5)                          | 0.0835(4)                         | 1.141                             |
| S2                | 0.0893(5)                          | 0.0775(4)                         | 1.152                             |
| S3                | 0.1008(5)                          | 0.0943(5)                         | 1.069                             |
| S4                | 0.0903(5)                          | 0.0825(4)                         | 1.095                             |
| N1                | 0.152(3)                           | 0.140(2)                          | 1.086                             |
| N2                | 0.161(3)                           | 0.142(2)                          | 1.134                             |
| N3                | 0.154(3)                           | 0.150(2)                          | 1.027                             |
| N4                | 0.127(2)                           | 0.125(2)                          | 1.016                             |
| N5                | 0.140(2)                           | 0.131(2)                          | 1.069                             |
| N6                | 0.173(3)                           | 0.180(4)                          | 0.929                             |
| C1                | 0.112(2)                           | 0.0971(17)                        | 1.153                             |
| C2                | 0.0920(16)                         | 0.0774(13)                        | 1.189                             |
| C3                | 0.0828(15)                         | 0.0726(13)                        | 1.140                             |
| C4                | 0.111(2)                           | 0.0950(16)                        | 1.169                             |
| C5                | 0.117(2)                           | 0.1093(19)                        | 1.070                             |
| C6                | 0.0921(16)                         | 0.0896(16)                        | 1.028                             |
| C7                | 0.0856(16)                         | 0.0833(15)                        | 1.028                             |
| C8                | 0.0973(18)                         | 0.0967(17)                        | 1.006                             |
| C9                | 0.155(3)                           | 0.154(3)                          | 1.006                             |
| C10               | 0.148(3)                           | 0.151(3)                          | 0.961                             |
| C11               | 0.159(3)                           | 0.175(4)                          | 0.909                             |
| C12               | 0.156(3)                           | 0.147(3)                          | 1.061                             |
| C13               | 0.162(4)                           | 0.139(3)                          | 1.165                             |
| C14               | 0.299(9)                           | 0.264(8)                          | 1.133                             |
| C15               | 0.151(3)                           | 0.165(4)                          | 0.915                             |
| C16               | 0.144(3)                           | 0.118(2)                          | 1.22                              |

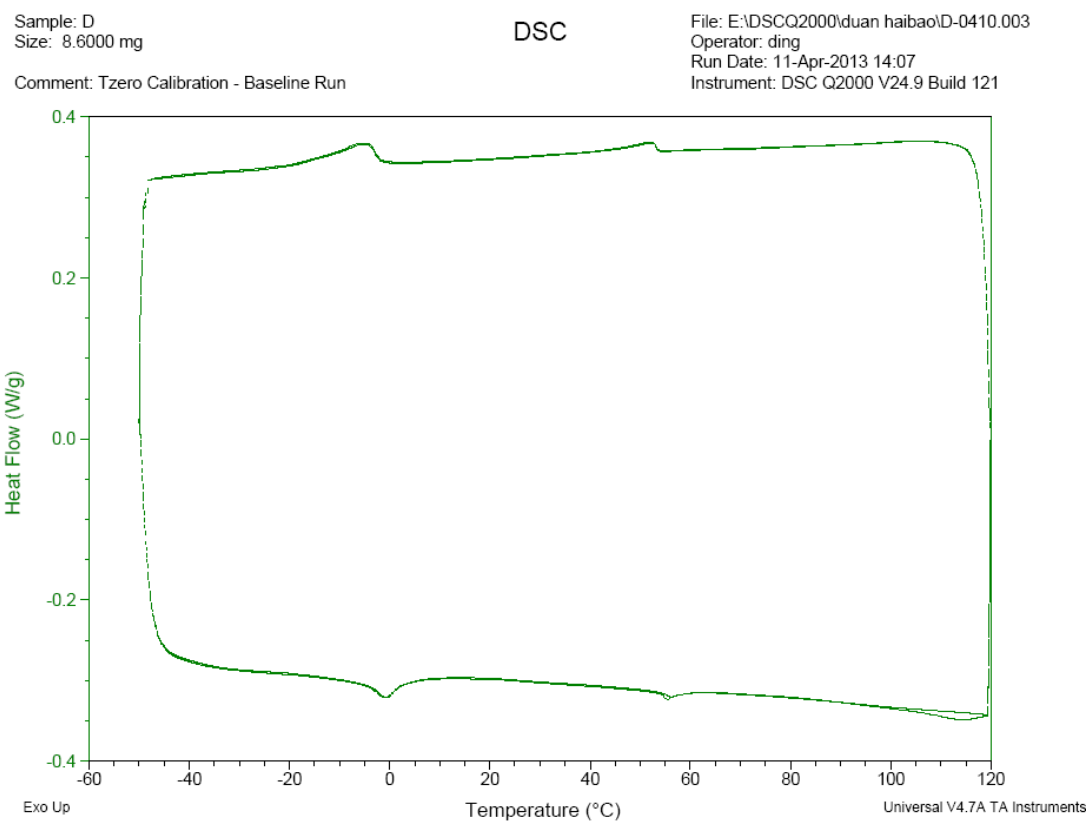

Figure S1 DSC plot of 1.
